# Supplementary material
Source: PubMed Central journal article supplement (PMC2686387)
Supplement: Coulson.Table_S1.pdf [file Coulson.Table_S1.pdf]

Supplementary table 1. Number of archaeal genes matching domains present in RNA polymerase subunits

| Pfam ID | <i>A<sub>p</sub></i> | <i>P<sub>a</sub></i> | <i>S<sub>s</sub></i> | <i>S<sub>t</sub></i> | <i>A<sub>f</sub></i> | <i>H<sub>a</sub></i> | <i>M<sub>a</sub></i> | <i>M<sub>j</sub></i> | <i>M<sub>k</sub></i> | <i>M<sub>m</sub></i> | <i>M<sub>t</sub></i> | <i>P<sub>a</sub></i> | <i>P<sub>h</sub></i> | <i>T<sub>a</sub></i> | <i>T<sub>v</sub></i> | Pfam HMM description                             |
|---------|----------------------|----------------------|----------------------|----------------------|----------------------|----------------------|----------------------|----------------------|----------------------|----------------------|----------------------|----------------------|----------------------|----------------------|----------------------|--------------------------------------------------|
| PF04997 | 1                    | 1                    | 1                    | 1                    | 1                    | 1                    | 1                    | 1                    | 1                    | 1                    | 1                    | 1                    | 1                    | 1                    | 1                    | RNA polymerase Rpb1, domain 1                    |
| PF00623 | 1                    | 1                    | 1                    | 1                    | 1                    | 1                    | 1                    | 1                    | 1                    | 1                    | 2                    | 1                    | 1                    | 1                    | 1                    | RNA polymerase Rpb1, domain 2                    |
| PF04983 | 1                    | 1                    | 1                    | 1                    | 1                    | 1                    | 1                    | 1                    | 1                    | 1                    | 2                    | 1                    | 1                    | 1                    | 1                    | RNA polymerase Rpb1, domain 3                    |
| PF05000 | 1                    | 1                    | 1                    | 1                    | 1                    | 1                    | 1                    | 1                    | 1                    | 1                    | 2                    | 1                    | 1                    | 1                    | 1                    | RNA polymerase Rpb1, domain 4                    |
| PF04998 | 1                    | 1                    | 1                    | 1                    | 1                    | 1                    | 1                    | 1                    | 1                    | 1                    | 1                    | 1                    | 1                    | 1                    | 1                    | RNA polymerase Rpb1, domain 5                    |
| PF04563 | 1                    | 1                    | 1                    | 1                    | 1                    | 1                    | 1                    | 1                    | 1                    | 1                    | 1                    | 1                    | 1                    | 1                    | 1                    | RNA polymerase beta subunit                      |
| PF04561 | 1                    | 1                    | 1                    | 1                    | 1                    | 1                    | 1                    | 1                    | -                    | 1                    | 1                    | 1                    | 1                    | 1                    | 1                    | RNA polymerase Rpb2, domain 2                    |
| PF04565 | 1                    | 1                    | 1                    | 1                    | 1                    | 1                    | 1                    | 1                    | 1                    | 1                    | 1                    | 1                    | 1                    | 1                    | 1                    | RNA polymerase Rpb2, domain 3                    |
| PF04566 | 1                    | 1                    | 1                    | 1                    | 1                    | 1                    | 1                    | 1                    | 1                    | 1                    | 1                    | 1                    | 1                    | 1                    | 1                    | RNA polymerase Rpb2, domain 4                    |
| PF04567 | 1                    | 1                    | 1                    | 1                    | 1                    | 1                    | 1                    | 1                    | 1                    | 1                    | 1                    | 1                    | 1                    | 1                    | 1                    | RNA polymerase Rpb2, domain 5                    |
| PF00562 | 1                    | 1                    | 1                    | 1                    | 1                    | 1                    | 1                    | 1                    | 1                    | 1                    | 1                    | 1                    | 1                    | 1                    | 1                    | RNA polymerase Rpb2, domain 6                    |
| PF04560 | 1                    | 1                    | 1                    | 1                    | 1                    | 1                    | 1                    | 1                    | 1                    | 1                    | 1                    | 1                    | 1                    | 1                    | 1                    | RNA polymerase Rpb2, domain 7                    |
| PF01000 | 1                    | 1                    | 1                    | 1                    | 1                    | 1                    | 1                    | 1                    | 1                    | 1                    | 1                    | 1                    | 1                    | 1                    | 1                    | RNA polymerase Rpb3/RpoA insert domain           |
| PF03874 | 1                    | -                    | 1                    | -                    | 1                    | 1                    | 1                    | 1                    | -                    | 1                    | 1                    | 1                    | 1                    | 1                    | 1                    | RNA polymerase Rpb4                              |
| PF01191 | 1                    | 1                    | 1                    | 1                    | 1                    | 1                    | 1                    | 1                    | 1                    | 1                    | 1                    | 1                    | 1                    | 1                    | 1                    | RNA polymerase Rpb5, C-terminal domain           |
| PF01192 | 1                    | 1                    | 1                    | 1                    | 1                    | 1                    | 1                    | 1                    | 1                    | 1                    | 1                    | 1                    | -                    | 1                    | 1                    | RNA polymerase Rpb6                              |
| PF03876 | 1                    | 1                    | 1                    | 1                    | 1                    | 1                    | 1                    | 1                    | 1                    | 1                    | 1                    | 1                    | 1                    | 1                    | 1                    | RNA polymerase Rpb7, N-terminal domain           |
| PF04035 | 1                    | -                    | 1                    | 1                    | 1                    | 1                    | -                    | 1                    | -                    | -                    | 1                    | 1                    | -                    | 1                    | 1                    | Archaeal DNA-directed RNA polymerase subunit E'' |
| PF01193 | 1                    | -                    | 1                    | 1                    | 1                    | 1                    | 1                    | 1                    | 1                    | 1                    | 1                    | 1                    | -                    | 1                    | -                    | RNA polymerases L / 13 to 16 kDa subunit         |
| PF02150 | 1                    | 2                    | 3                    | 2                    | 1                    | 2                    | 1                    | 1                    | -                    | 1                    | 1                    | 1                    | 1                    | 1                    | 1                    | RNA polymerases M/15 Kd subunit                  |
| PF01194 | 1                    | 1                    | 1                    | 1                    | 1                    | 1                    | 1                    | 1                    | 1                    | 1                    | 1                    | 1                    | 1                    | 1                    | 1                    | RNA polymerases N / 8 kDa subunit                |

Columns: **Pfam ID**, accession number of the Pfam entry; columns 2-16, number of genes matching the TA-HMM. The top row of these columns shows the two letter species code of the genome (please see figure 2); **Pfam HMM descriptions**, protein domain annotation provided by Pfam.
