# Supplementary material
Source: PubMed Central journal article supplement (PMC2686387)
Supplement: Coulson.Table_S2.pdf [file Coulson.Table_S2.pdf]

Supplementary table 2. RNA polymerase subunit gene copy number in archaeal genomes

| RNAP subunits | Cluster Index/<br>Taxonomy | Crenarchaeota |      |      |      | Euryarchaeota |      |      |      |      |      |      |      |      |      |      |   |
|---------------|----------------------------|---------------|------|------|------|---------------|------|------|------|------|------|------|------|------|------|------|---|
|               |                            | APER          | PAER | SSOL | STOK | AFUL          | HALO | MACE | MUAN | MKAN | MMAZ | MTHE | PABY | PHOR | TACI | TVOL |   |
| A             | 270 / B-E                  | 2             | 2    | 2    | 2    | 2             | 2    | 2    | 2    | 2    | 2    | 2    | 5    | 2    | 2    | 2    | 2 |
| B             | 267 / E                    | 1             | 1    | 2    | 1    | 2             | 2    | 2    | 2    | 2    | 2    | 2    | 2    | 1    | 1    | 1    | 1 |
|               | 277 / B-E                  | -             | -    | -    | -    | -             | -    | -    | -    | -    | -    | -    | -    | -    | -    | -    | 1 |
| D             | 256 / E                    | 1             | 1    | 1    | 1    | 2             | 1    | 2    | 1    | 1    | 1    | 1    | 1    | 1    | 1    | 1    | 1 |
| E             | 226 / E                    | 1             | 1    | 1    | 1    | 1             | 1    | 1    | 1    | 1    | 1    | 1    | 1    | 1    | 1    | 1    | 1 |
|               | 195 / A                    | -             | -    | 1    | 1    | 1             | -    | 1    | 1    | 1    | 1    | 1    | 1    | 1    | -    | 1    | 1 |
| H             | 247 / E                    | 1             | 1    | 1    | 1    | 1             | 1    | 1    | 1    | 1    | 1    | 1    | 1    | 1    | 1    | 1    | 1 |
| K             | 38 / A                     | -             | -    | -    | -    | -             | -    | -    | 1    | -    | -    | -    | -    | -    | -    | -    | - |
|               | 239 / E                    | 1             | 1    | 1    | 1    | 1             | 1    | 1    | -    | 1    | 1    | 1    | 1    | 1    | -    | 1    | 1 |
| L             | 180 / E                    | -             | -    | 1    | 1    | -             | -    | -    | -    | -    | -    | -    | -    | -    | -    | -    | - |
|               | 49 / A                     | 1             | -    | -    | -    | -             | -    | -    | -    | -    | -    | -    | -    | -    | -    | -    | - |
|               | 206 / A                    | -             | 1    | -    | -    | 1             | 1    | 1    | 1    | -    | 1    | 1    | 1    | 1    | -    | -    | 1 |
| N             | 245 / E                    | 1             | 1    | 1    | 1    | 1             | 1    | 1    | 1    | 1    | 1    | 1    | 1    | 1    | 1    | 1    | 1 |

Columns: **RNAP subunits**, RNA polymerase subunit family as determined from the SwissProt functional annotations of the TAP members. (The “**A**” family contains subunits A’ and A”, and the “**B**” families contain subunits B’ and B”); **Cluster Index/Taxonomy**, the identifier of the TRIBE-MCL family and which domains of life the TAP reference sequences originate: **A** - Archaea, **B** - Bacteria, **E** - Eukaryota; columns 3-17, the number of archaeal sequences present within a family. The four letter species codes in the second row of these columns are defined in the Methods section.
